# Supplementary figures and images for: A pan-cancer interrogation of intronic polyadenylation and its association with cancer characteristics
Source: Research Square preprint supplement (doi:10.21203/rs.3.rs-2321147/v1), 2022-12-01

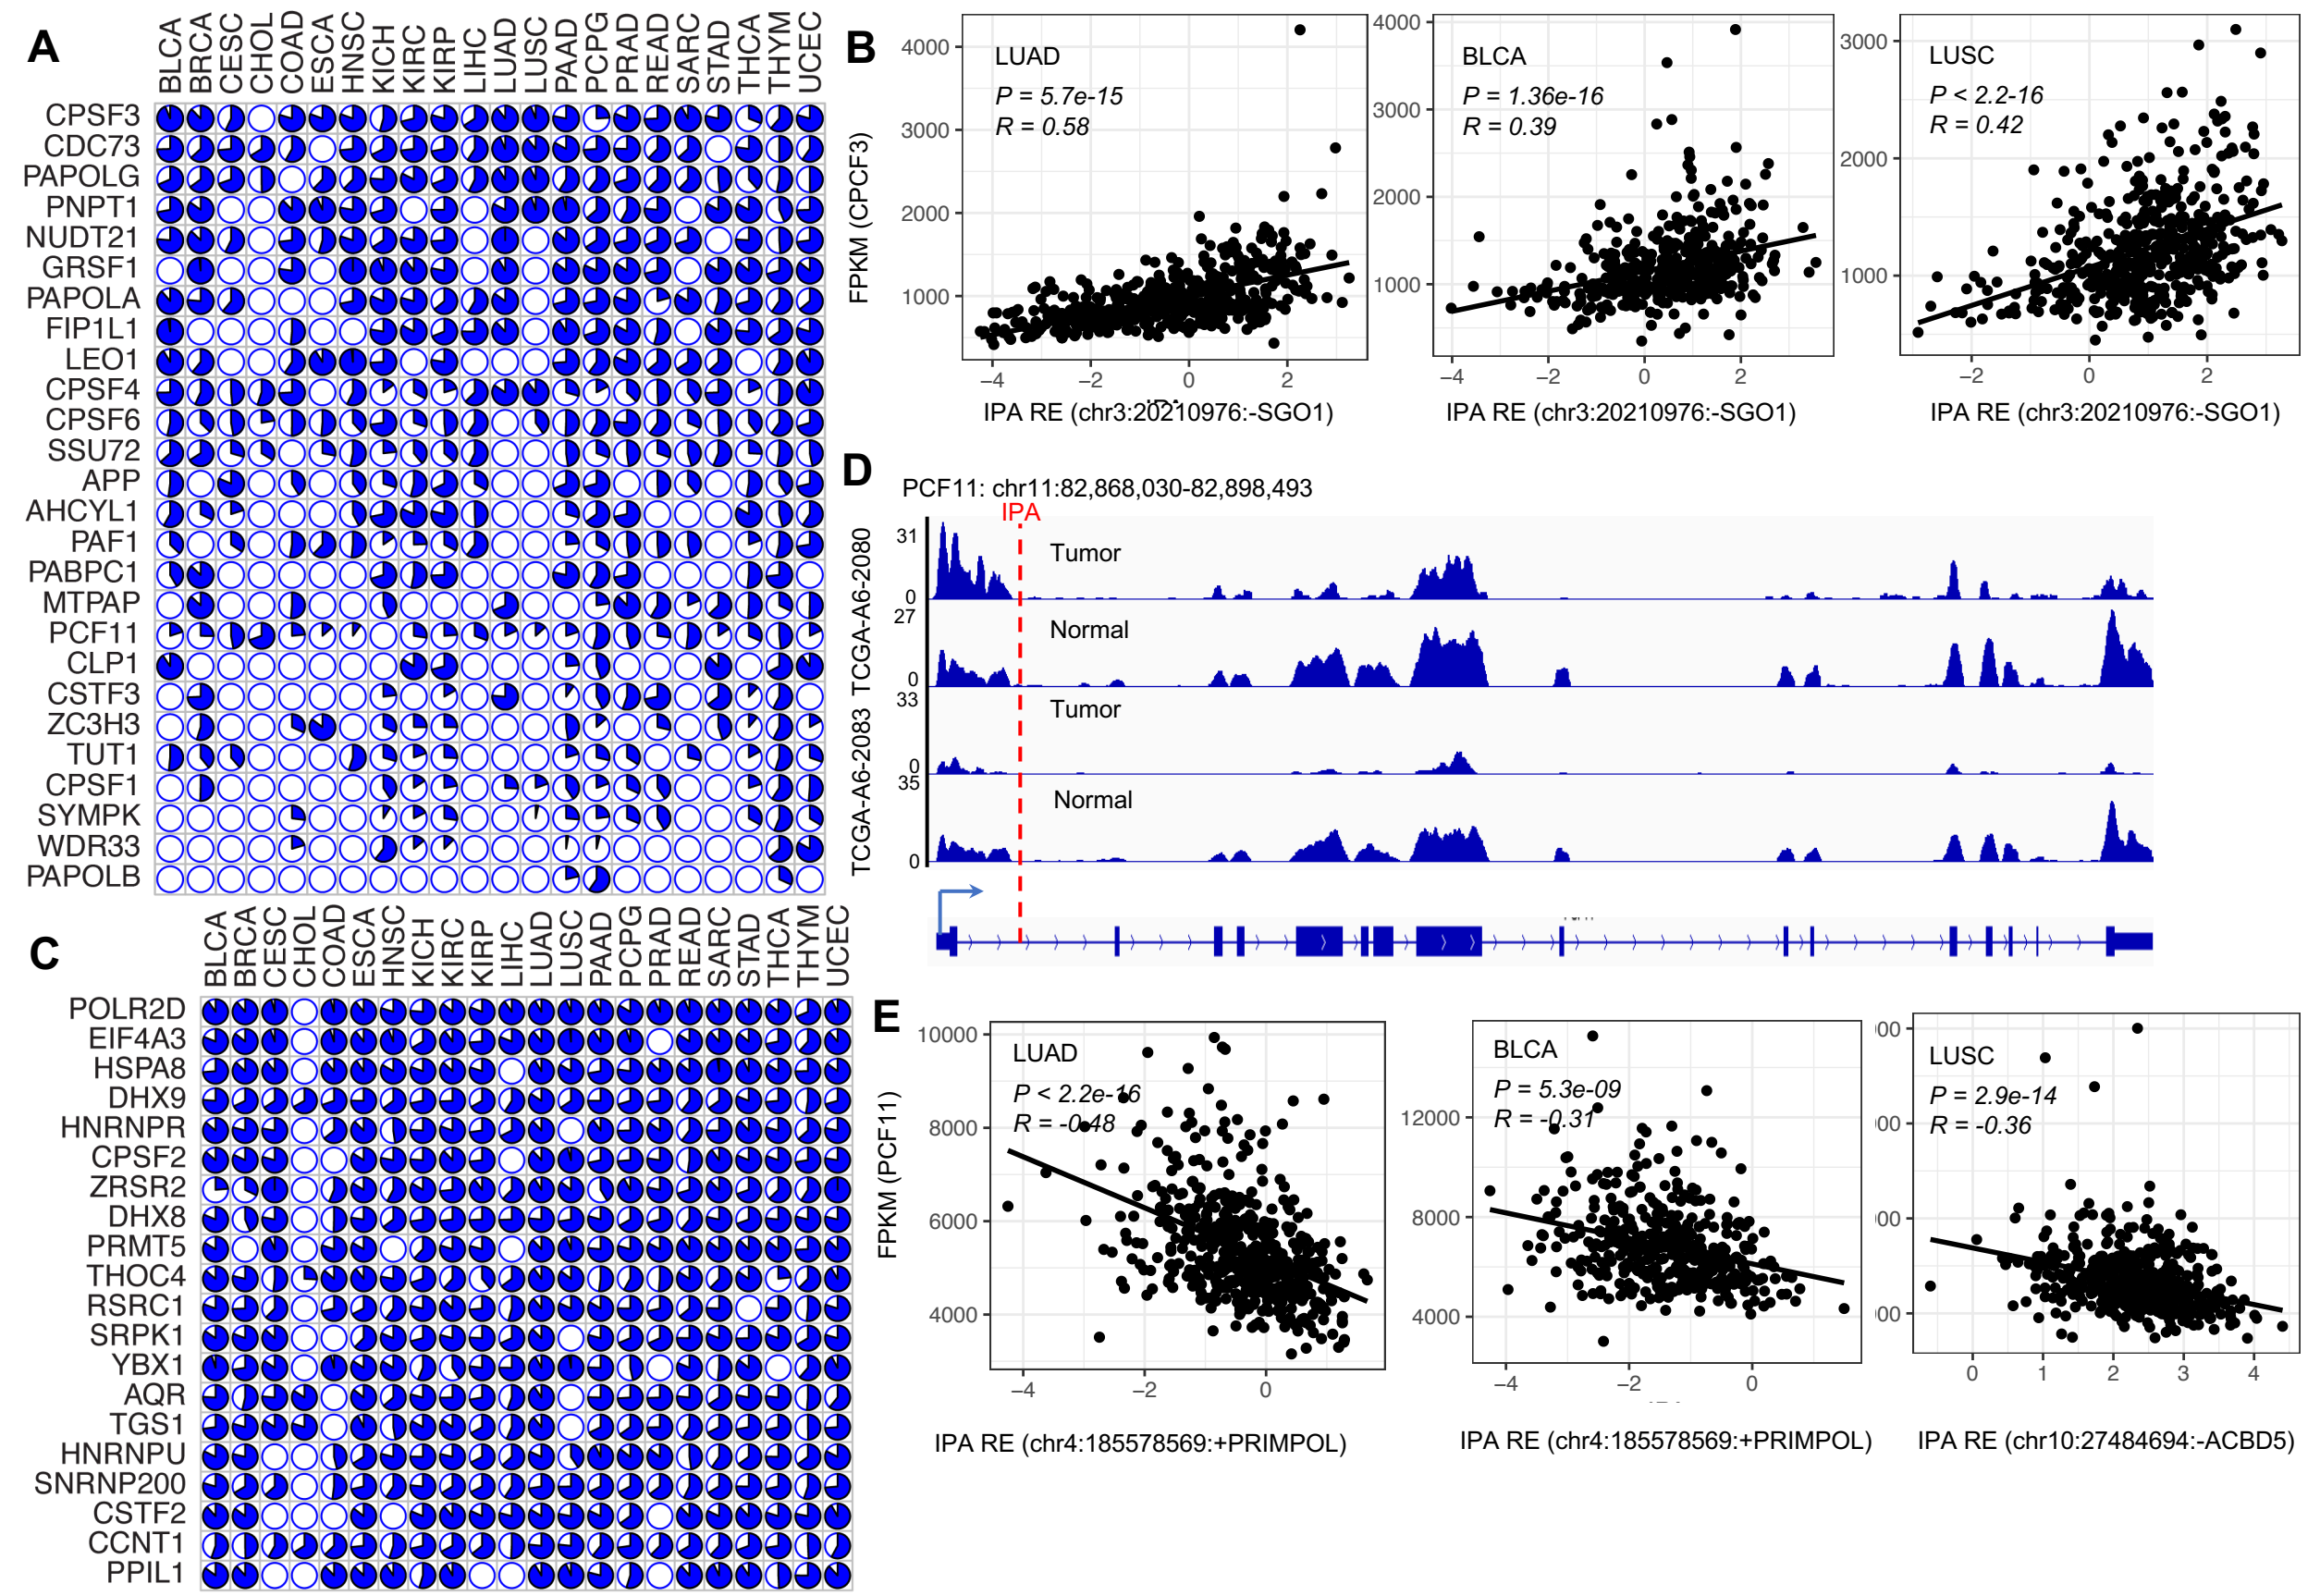

Supplement: Supplementary file 1 [file 85a253332b4299e553520449.pdf]
